# Supplementary material for: Metallosupramolecules of pillar[5]-bis-trithiacrown including a mercury(ii) iodide ion-triplet complex
Source: Royal Society of Chemistry journal article supplement (doi:10.1039/d0cc03902k), 2020-01-01
Supplement: d0cc03902k1.pdf [file d0cc03902k1.pdf]

## **Electronic supplementary information**

### **Metallosupramolecules of pillar[5]-*bis*-trithiacrown including a mercury(II) iodide ion-triplet complex**

Mingyeong Shin,<sup>a</sup> Sujin Seo,<sup>a</sup> In-Hyeok Park,<sup>a</sup> Eunji Lee,<sup>a,b</sup> Yoichi Habata<sup>b</sup> and Shim Sung Lee\*<sup>a</sup>

## Experimental section

**General.** All chemicals and solvents used in the syntheses were of reagent grade and were used without further purification. NMR spectra were recorded on a Bruker DRX 300. The IR were recorded on a Thermo Fisher Scientific Nicolet iS 10 FT-IR spectrometer using KBr pellets. ESI-Mass spectra were obtained on a Thermo Scientific LCQ Fleet spectrometer. The absorption spectra were recorded on a Scinco S-3150 UV-visible spectrophotometer. The elemental analysis was performed on a Thermo-Fisher Scientific Flash 2000 elemental analyser.

**X-ray crystallographic analysis.** Crystal data were collected on a Bruker SMART APEX II ULTRA diffractometer equipped with graphite monochromated Mo K $\alpha$  radiation ( $\lambda = 0.71073 \text{ \AA}$ ). Data collection, data reduction and semi-empirical absorption correction were carried out using the software package of APEX2.<sup>S1</sup> All of the calculations for the structure determination were carried out using the SHELXTL package<sup>S2</sup> All nonhydrogen atoms were refined anisotropically and all H atoms were placed in idealized positions and refined isotropically in a riding manner along with their respective parent atoms. In the refinement procedure of **L**, the S1-C24-C25-S2-C26 and O3-C19 segments are disordered over two sites occupied in a 70 : 30 ratio (see Fig. S4a). The *n*-hexane in the cavity of **L** is also disordered over two sites occupied in a 50 : 50 ratio (see Fig. S4b). In the refinement procedures for **1** and **3**, the C25-C26 segments are disordered over two sites occupied in a 54 : 46 ratio (see Figs. S5 and S7). Since the lattice solvent molecules in **2** is highly disordered, the contribution of solvent electron density was removed by the SQUEEZE routine in PLATON.<sup>S4</sup> Relevant crystal data collection and refinement data for the crystal structures are summarized in Table S1. CCDC 2004262 (**L**), 2004263 (**1**), 2004264 (**2**) and 2004265 (**3**) contain the supplementary crystallographic data for this paper. These data can be obtained free of charge from the Cambridge Crystallographic Data Centre via [www.ccdc.cam.ac.uk/data\\_request/cif](http://www.ccdc.cam.ac.uk/data_request/cif).

**Synthesis of pillar[5]-bis-trithiacrown (**L**).** A solution of pillar[5]arene tetrabromide<sup>S3</sup> (1.00 g, 0.89 mmol) and bis(2-mercaptoethyl) sulfide (0.68 g, 4.41 mmol) in CH<sub>3</sub>CN (100 mL) was added dropwise to a refluxed solution of K<sub>2</sub>CO<sub>3</sub> (0.62 g, 4.48 mmol) in CH<sub>3</sub>CN (200 mL) for 1 h under nitrogen and the reaction mixture was refluxed for a further 48 h. After cooling the reaction mixture to room temperature, the solvent was evaporated and the residue was extracted with dichloromethane. The combined organic phases were dried with anhydrous sodium sulfate and then evaporated to dryness. Flash column chromatography (SiO<sub>2</sub>; 20 % ethyl acetate: *n*-hexane) afforded the product as a white solid in 25% yield. Mp: 111-112 °C. <sup>1</sup>H NMR (300 MHz, CDCl<sub>3</sub>):  $\delta$  7.03-6.83 (*m*, 10 H, Ar), 4.20-4.02 (*m*, 8 H, SCH<sub>2</sub>CH<sub>2</sub>O), 3.86-3.70 (*m*, 28 H, ArCH<sub>2</sub>Ar, OCH<sub>3</sub>), 3.01-2.96 (*m*, 8 H, SCH<sub>2</sub>CH<sub>2</sub>O), 2.84-2.76 (*m*, 16 H, SCH<sub>2</sub>CH<sub>2</sub>S). <sup>13</sup>C NMR (125 MHz, CDCl<sub>3</sub>): 151.02, 150.52, 149.62, 149.32, 128.36, 128.22, 128.17, 128.01, 127.78, 115.15, 114.45, 113.98, 77.54, 77.12, 76.70, 68.23, 66.87, 56.33, 56.03, 55.89, 33.55, 32.81, 32.59, 32.51, 32.44, 31.59, 29.69, 28.81. IR: 2928, 2483, 2139, 2030, 1724, 1610, 1496, 1464, 1397, 1308, 1204, 1100, 1041, 929, 877, 851, 772, 725,

702  $\text{cm}^{-1}$ . Anal. calcd. for  $[\text{C}_{57}\text{H}_{70}\text{O}_{10}\text{S}_6] \cdot \text{CH}_2\text{Cl}_2$ : C, 58.42; H, 6.09%. Found: C, 58.27; H, 6.34%. MS (ESI)  $m/z = 1129.50$   $[\text{L}+\text{Na}]^+$ .

**Preparation of 1,  $[\text{HgCl}_2(\text{CH}_2\text{Cl}_2@L)]$ .** Toluene (0.2 mL) was added to a dichloromethane (1.0 mL) solution of **L** (20.3 mg, 0.018 mmol) in a capillary tube (i.d. 5 mm); then  $\text{HgCl}_2$  (14.7 mg, 0.054 mmol) in acetonitrile (1.0 mL) was layered on the toluene phase. Slow evaporation of the solution in the capillary tube afforded block-shaped colorless crystals of **1** (30% yield) suitable for the X-ray analysis. Mp: 145-146 °C (decomp.). IR: 2974, 2927, 1722, 1610, 1498, 1464, 1399, 1209, 1094, 1046, 930, 880, 854, 772, 726, 702  $\text{cm}^{-1}$ . Anal. Calcd for  $[\text{C}_{57}\text{H}_{70}\text{Cl}_2\text{HgO}_{10}\text{S}_6] \cdot 2\text{CH}_2\text{Cl}_2$ : C, 45.75; H, 4.82%. Found: C, 45.54; H, 4.81%. MS (ESI)  $m/z = 1342.92$   $[\text{HgLCl}]^+$

**Preparation of 2,  $[\text{Hg}_6\text{Br}_{12}(\text{CH}_3\text{CN}@L)_2]_n$ .** A solution of  $\text{HgBr}_2$  (19.7 mg, 0.055 mmol) in acetonitrile (1.0 mL) was layered onto a solution of **L** (20.0 mg, 0.018 mmol) in chloroform (1.0 mL). Slow evaporation of the solution in a capillary tube afforded a lump of the block-shaped colorless of **2** (10% yield) suitable for the X-ray analysis. Mp: 154-155 °C (decomp.). IR: 2973, 2929, 2872, 2488, 2044, 1748, 1611, 1499, 1464, 1400, 1308, 1211, 1094, 1048, 930, 879, 854, 773, 726  $\text{cm}^{-1}$ . Anal. Calcd for  $[\text{C}_{57}\text{H}_{70}\text{Br}_6\text{Hg}_3\text{O}_{10}\text{S}_6] \cdot 3\text{CHCl}_3$ : C, 28.30; H, 2.89%. Found: C, 28.17; H, 3.00%.

**Preparation of 3,  $[\text{I} \cdot \text{Hg} \cdot \text{I}@L]$ .** Toluene (0.2 mL) was added to a dichloromethane (0.7 mL) solution of **L** (20.3 mg, 0.018 mmol); then  $\text{HgI}_2$  (24.6 mg, 0.054 mmol) in methanol (1.0 mL) was layered on the toluene phase. Slow evaporation of the solution in a capillary tube afforded a lump of the needle-shaped yellow of **3** (10% yield) suitable for the X-ray analysis. Mp: 165-166 °C (decomp.). IR: 2971, 2926, 2825, 2483, 1611, 1498, 1464, 1399, 1263, 1095, 1047, 934, 877, 852, 772, 702  $\text{cm}^{-1}$ . Anal. Calcd for  $[\text{C}_{57}\text{H}_{70}\text{HgI}_2\text{O}_{10}\text{S}_6]$ : C, 43.83; H, 4.52%. Found: C, 44.03; H, 4.54%. MS (ESI)  $m/z$ : 1484.83  $[(\text{Hg} \cdot \text{I})@L]^+$  or  $[\mathbf{3} \cdot \text{I}]^+$ .

**Table S1** Crystal and experimental data

|                                                                                      | <b>L</b>                                                       | <b>1</b>                                                                          | <b>2</b>                                                                                                            | <b>3</b>                                                                        |
|--------------------------------------------------------------------------------------|----------------------------------------------------------------|-----------------------------------------------------------------------------------|---------------------------------------------------------------------------------------------------------------------|---------------------------------------------------------------------------------|
| Formula                                                                              | C <sub>63</sub> H <sub>84</sub> O <sub>10</sub> S <sub>6</sub> | C <sub>59</sub> H <sub>74</sub> Cl <sub>6</sub> HgO <sub>10</sub> S <sub>62</sub> | C <sub>118</sub> H <sub>147</sub> Br <sub>12</sub> ClHg <sub>6</sub> N <sub>2</sub> O <sub>20</sub> S <sub>12</sub> | C <sub>57</sub> H <sub>70</sub> HgI <sub>2</sub> O <sub>10</sub> S <sub>6</sub> |
| Formula weight                                                                       | 1193.66                                                        | 1548.83                                                                           | 4496.00                                                                                                             | 1561.88                                                                         |
| Temperature                                                                          | 223(2)                                                         | 223(2)                                                                            | 173(2)                                                                                                              | 193(2)                                                                          |
| Crystal system                                                                       | Monoclinic                                                     | Monoclinic                                                                        | Monoclinic                                                                                                          | Monoclinic                                                                      |
| Space group                                                                          | <i>C2/c</i>                                                    | <i>Cc</i>                                                                         | <i>Pc</i>                                                                                                           | <i>P2<sub>1</sub>/c</i>                                                         |
| <i>Z</i>                                                                             | 4                                                              | 4                                                                                 | 2                                                                                                                   | 4                                                                               |
| <i>a</i> (Å)                                                                         | 20.2460(9)                                                     | 11.9926(6)                                                                        | 15.5878(2)                                                                                                          | 20.1865(4)                                                                      |
| <i>b</i> (Å)                                                                         | 15.2630(7)                                                     | 27.5154(12)                                                                       | 20.0801(3)                                                                                                          | 15.1666(3)                                                                      |
| <i>c</i> (Å)                                                                         | 21.6226(10)                                                    | 20.3121(11)                                                                       | 24.7383(4)                                                                                                          | 22.7025(4)                                                                      |
| <i>α</i> (deg)                                                                       | 90                                                             | 90                                                                                | 90                                                                                                                  | 90                                                                              |
| <i>β</i> (deg)                                                                       | 114.172(2)                                                     | 93.071(3)                                                                         | 94.6820(10)                                                                                                         | 120.1480(10)                                                                    |
| <i>γ</i> (deg)                                                                       | 90                                                             | 90                                                                                | 90                                                                                                                  | 90                                                                              |
| <i>V</i> (Å <sup>3</sup> )                                                           | 6095.9(5)                                                      | 6620.0(6)                                                                         | 7717.4(2)                                                                                                           | 6010.4(2)                                                                       |
| Flack parameter                                                                      |                                                                | 0.029(9)                                                                          |                                                                                                                     |                                                                                 |
| <i>D</i> <sub>calc</sub> (g/cm <sup>3</sup> )                                        | 1.301                                                          | 1.554                                                                             | 1.935                                                                                                               | 1.726                                                                           |
| 2 <i>θ</i> <sub>max</sub> (deg)                                                      | 52.00                                                          | 52.00                                                                             | 52.00                                                                                                               | 52.00                                                                           |
| <i>R</i> <sub>1</sub> , <i>wR</i> <sub>2</sub> [ <i>I</i> > 2 <i>σ</i> ( <i>I</i> )] | 0.1043, 0.3368                                                 | 0.0583, 0.1282                                                                    | 0.0438, 0.0718                                                                                                      | 0.0557, 0.1518                                                                  |
| <i>R</i> <sub>1</sub> , <i>wR</i> <sub>2</sub> [all data]                            | 0.1489, 0.3753                                                 | 0.0941, 0.1453                                                                    | 0.0673, 0.0763                                                                                                      | 0.1095, 0.1827                                                                  |
| Goodness-of-fit on <i>F</i> <sup>2</sup>                                             | 1.354                                                          | 1.025                                                                             | 1.014                                                                                                               | 1.065                                                                           |
| No. of reflection used<br>[>2 <i>σ</i> ( <i>I</i> )]                                 | 5986<br>[ <i>R</i> <sub>int</sub> = 0.0613]                    | 12237<br>[ <i>R</i> <sub>int</sub> = 0.0557]                                      | 25567<br>[ <i>R</i> <sub>int</sub> = 0.0565]                                                                        | 11802<br>[ <i>R</i> <sub>int</sub> = 0.0629]                                    |
| CCDC No.                                                                             | 2004262                                                        | 2004263                                                                           | 2004264                                                                                                             | 2004265                                                                         |

**Table S2** Selected bond lengths (Å) and bond angles (°) for **1**

|             |            |            |            |
|-------------|------------|------------|------------|
| Hg1-S2      | 2.611(4)   | Hg1-S3     | 2.714(3)   |
| Hg1-Cl1     | 2.363(4)   | Hg1-Cl2    | 2.378(4)   |
| Cl1-Hg1-Cl2 | 126.39(14) | Cl1-Hg1-S2 | 111.71(16) |
| Cl2-Hg1-S2  | 113.10(14) | Cl1-Hg1-S3 | 110.31(11) |
| Cl2-Hg1-S3  | 103.34(12) | S2-Hg1-S3  | 82.41(12)  |

**Table S3** Selected bond lengths (Å) and bond angles (°) for **2**

|               |            |               |            |
|---------------|------------|---------------|------------|
| Hg1-Br1       | 2.4428(15) | Hg1-Br2       | 2.4448(16) |
| Hg1-S1        | 2.851(4)   | Hg2-Br3       | 2.4764(17) |
| Hg2-Br4       | 2.5528(17) | Hg2-S2        | 2.674(4)   |
| Hg2-S3        | 2.670(4)   | Hg3-Br5       | 2.5393(2)  |
| Hg3-Br6       | 2.5103(17) | Hg3-S4        | 2.584(4)   |
| Hg3-S5        | 2.677(4)   | Hg4-Br6       | 3.3172(1)  |
| Hg4-Br7       | 2.4607(15) | Hg4-Br8       | 2.4537(16) |
| Hg4-Br11A     | 3.3711(1)  | Hg4-S9        | 2.738(3)   |
| Hg5-Br9       | 2.4661(18) | Hg5-Br10      | 2.5003(17) |
| Hg5-S7        | 2.732(4)   | Hg5-S8        | 2.735(4)   |
| Hg6-Br11      | 2.5537(15) | Hg6-Br12      | 2.4587(16) |
| Hg6-S11       | 2.766(4)   | Hg6-S12       | 2.616(4)   |
|               |            |               |            |
| Br1-Hg1-Br2   | 166.20(6)  | Br1-Hg1-S1    | 98.88(8)   |
| Br2-Hg1-S1    | 93.70(8)   | Br3-Hg2-Br4   | 123.23(6)  |
| Br3-Hg2-S3    | 120.50(9)  | Br4-Hg2-S3    | 102.62(8)  |
| Br3-Hg2-S2    | 118.04(9)  | Br4-Hg2-S2    | 101.34(9)  |
| S2-Hg2-S3     | 82.74(11)  | Br5-Hg3-Br6   | 123.05(6)  |
| Br6-Hg3-S4    | 117.97(10) | Br5-Hg3-S4    | 109.65(10) |
| Br6-Hg3-S5    | 111.16(11) | Br5-Hg3-S5    | 101.55(11) |
| S4-Hg3-S5     | 85.52(13)  | Br6-Hg4-Br7   | 99.909(1)  |
| Br6-Hg4-Br8   | 88.857(1)  | Br6-Hg4-Br11A | 170.665(1) |
| Br6-Hg4-S9    | 89.086(1)  | Br7-Hg4-Br8   | 147.14(6)  |
| Br7-Hg4-Br11A | 85.327(1)  | Br7-Hg4-S9    | 103.36(8)  |
| Br8-Hg4-S9    | 108.43(8)  | Br8-Hg4-Br11A | 90.801(1)  |
| Br11A-Hg4-S9  | 108.089(1) | Br9-Hg5-Br10  | 139.95(6)  |
| Br9-Hg5-S7    | 106.09(9)  | Br9-Hg5-S8    | 111.19(9)  |
| Br10-Hg5-S7   | 102.28(9)  | Br10-Hg5-S8   | 100.72(9)  |
| S7-Hg5-S8     | 80.76(11)  | Br11-Hg6-Br12 | 126.99(6)  |
| Br11-Hg6-S11  | 97.65(9)   | Br11-Hg6-S12  | 104.17(9)  |
| Br12-Hg6-S11  | 110.90(9)  | Br12-Hg6-S12  | 122.77(9)  |
| S12-Hg6-S11   | 82.10(11)  |               |            |

Symmetry code: A) -1+x, -y, -1/2+z

**Table S4** Selected bond lengths (Å) and bond angles (°) for **3**

|             |            |             |            |
|-------------|------------|-------------|------------|
| I1-H21A     | 3.2335(1)  | I1-H28A     | 3.3335(0)  |
| I1-H36B     | 3.3874(1)  | I1-H47B     | 3.2132(0)  |
| I1-H55B     | 3.5277(0)  | I2-H7A      | 3.2447(1)  |
| I2-H14A     | 3.444(0)   | I2-H37B     | 3.2286(1)  |
| I2-H46B     | 3.4232(0)  | I2-H54B     | 3.2496(0)  |
|             |            |             |            |
| I1-H21A-C21 | 135.084(2) | I1-H28A-C28 | 133.193(2) |
| I1-H36B-C36 | 141.176(1) | I1-H47C-C47 | 155.295(1) |
| I1-H55B-C55 | 157.987(2) | I2-H7A-C7   | 141.596(2) |
| I2-H14A-C14 | 143.707(2) | I2-H37B-C37 | 139.66(1)  |
| I2-H46B-C46 | 150.819(2) | I2-H54B-C54 | 148.957(1) |

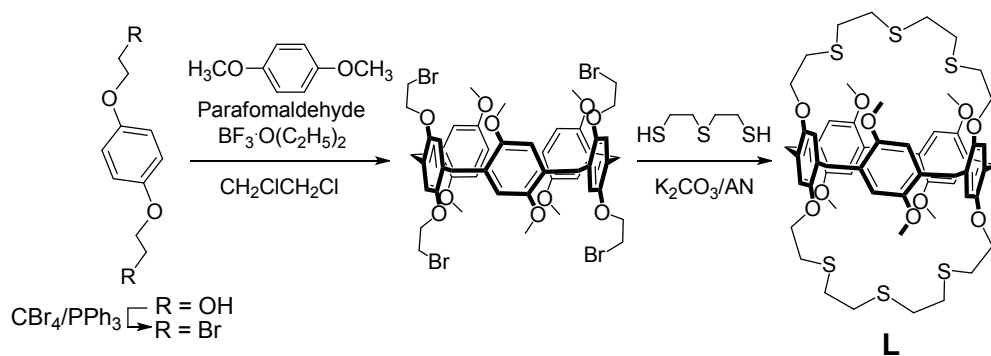

**Scheme S1** Synthesis of pillar[5]-bis-trithiacrown **L**.

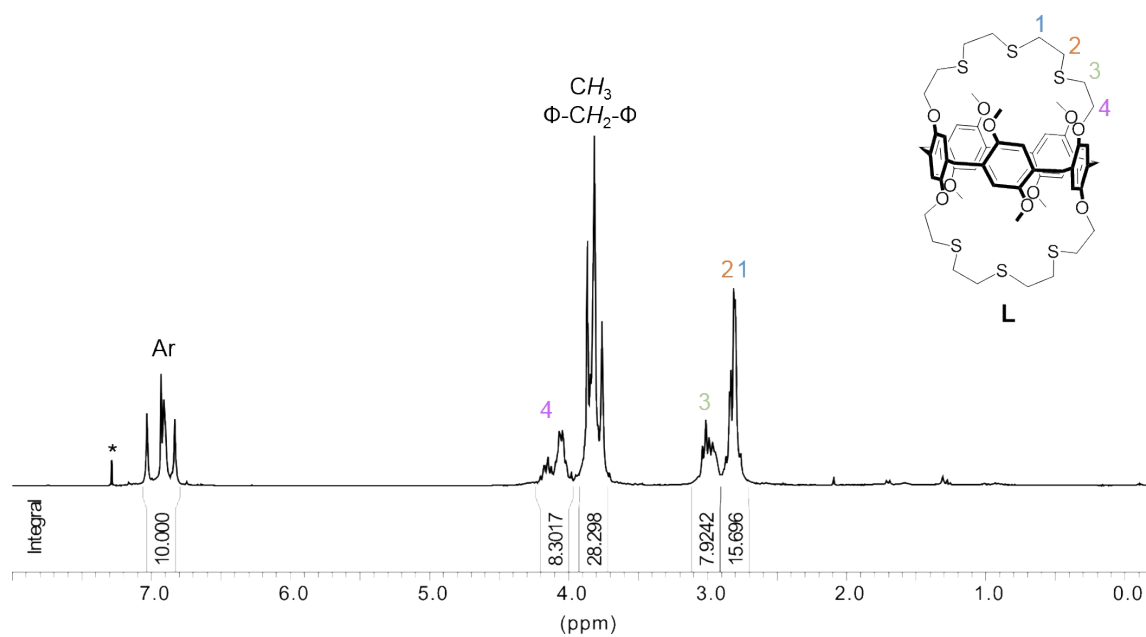

**Fig. S1**  $^1\text{H}$  NMR spectrum of **L** in  $\text{CDCl}_3$ .

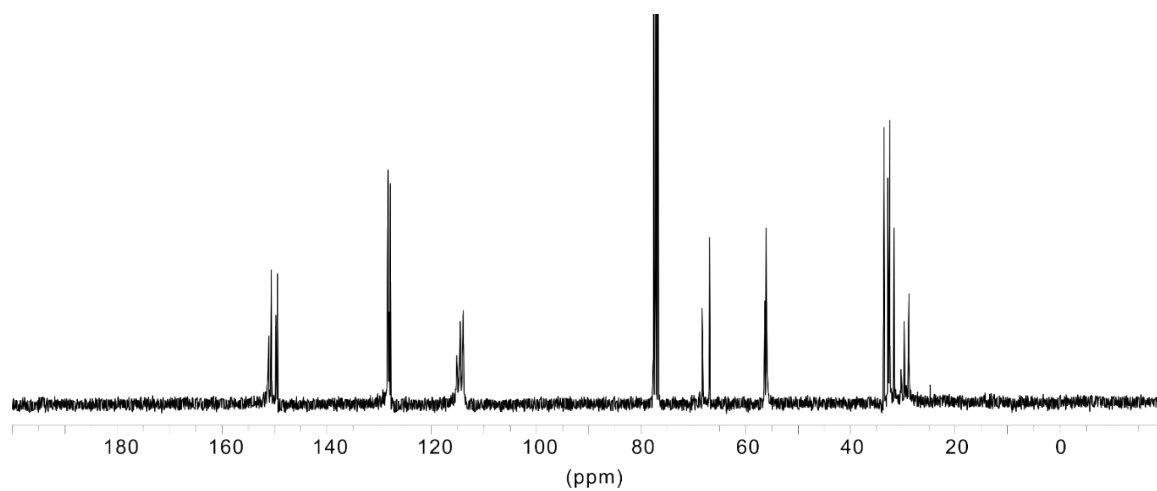

**Fig. S2**  $^{13}\text{C}$  NMR spectrum of **L** in  $\text{CDCl}_3$ .

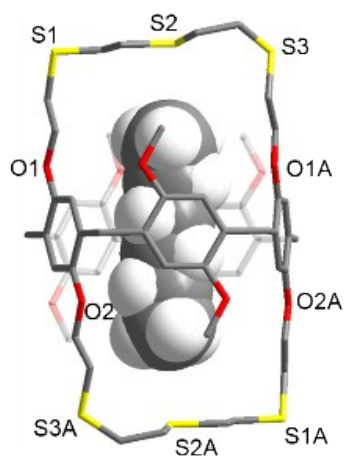

**Fig. S3** Crystal structure of *n*-hexane@L. Symmetry operation for A: 1-x, y, 0.5-z.

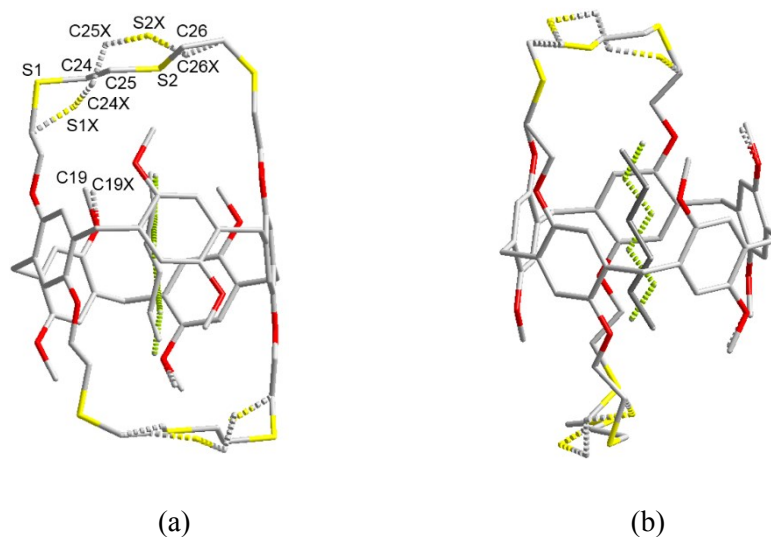

**Fig. S4** Crystal structure of *n*-hexane@L: (a) front view showing the atomic labelling for disorders of S1-C24-C25-S2-C26 segment, methoxy C19 atom and *n*-hexane molecule and (b) side view.

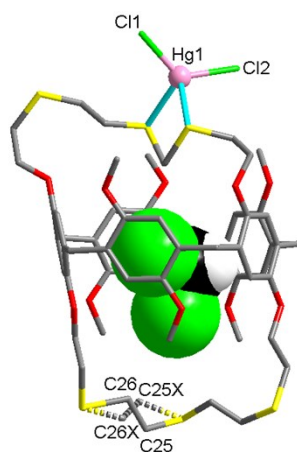

**Fig. S5** Crystal structure of **1** showing the thiacrown part disordered (C25-C26, 54:46).

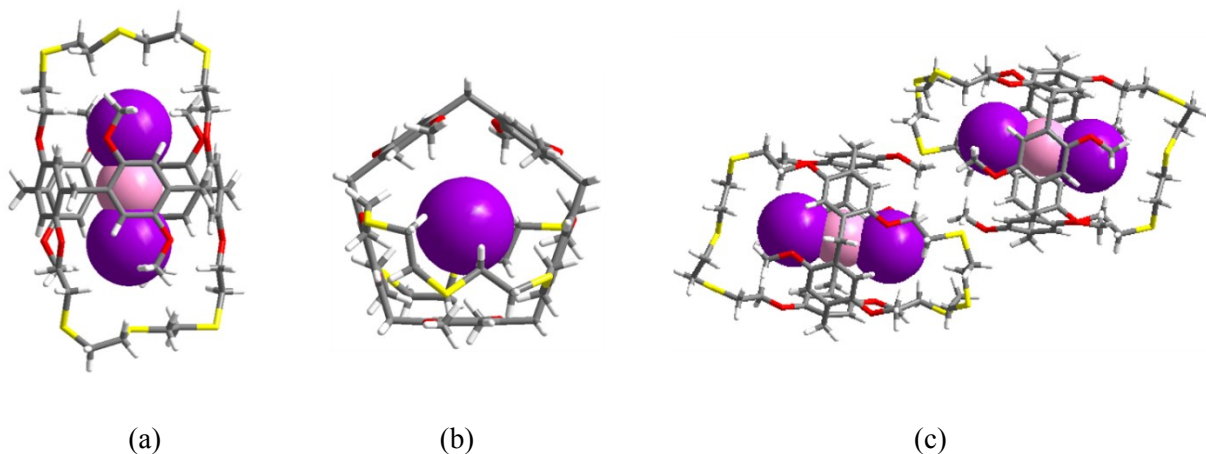

**Fig. S6** Crystal structure of **3**: (a) front view, (b) top view and (c) packing mode.

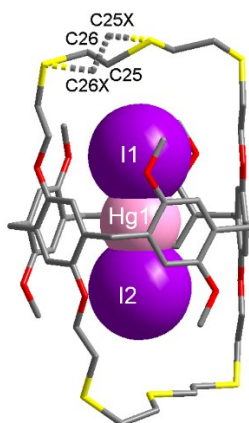

**Fig. S7** Crystal structure of **3** showing the thiacrown part disordered (C25-C26, 54:46).



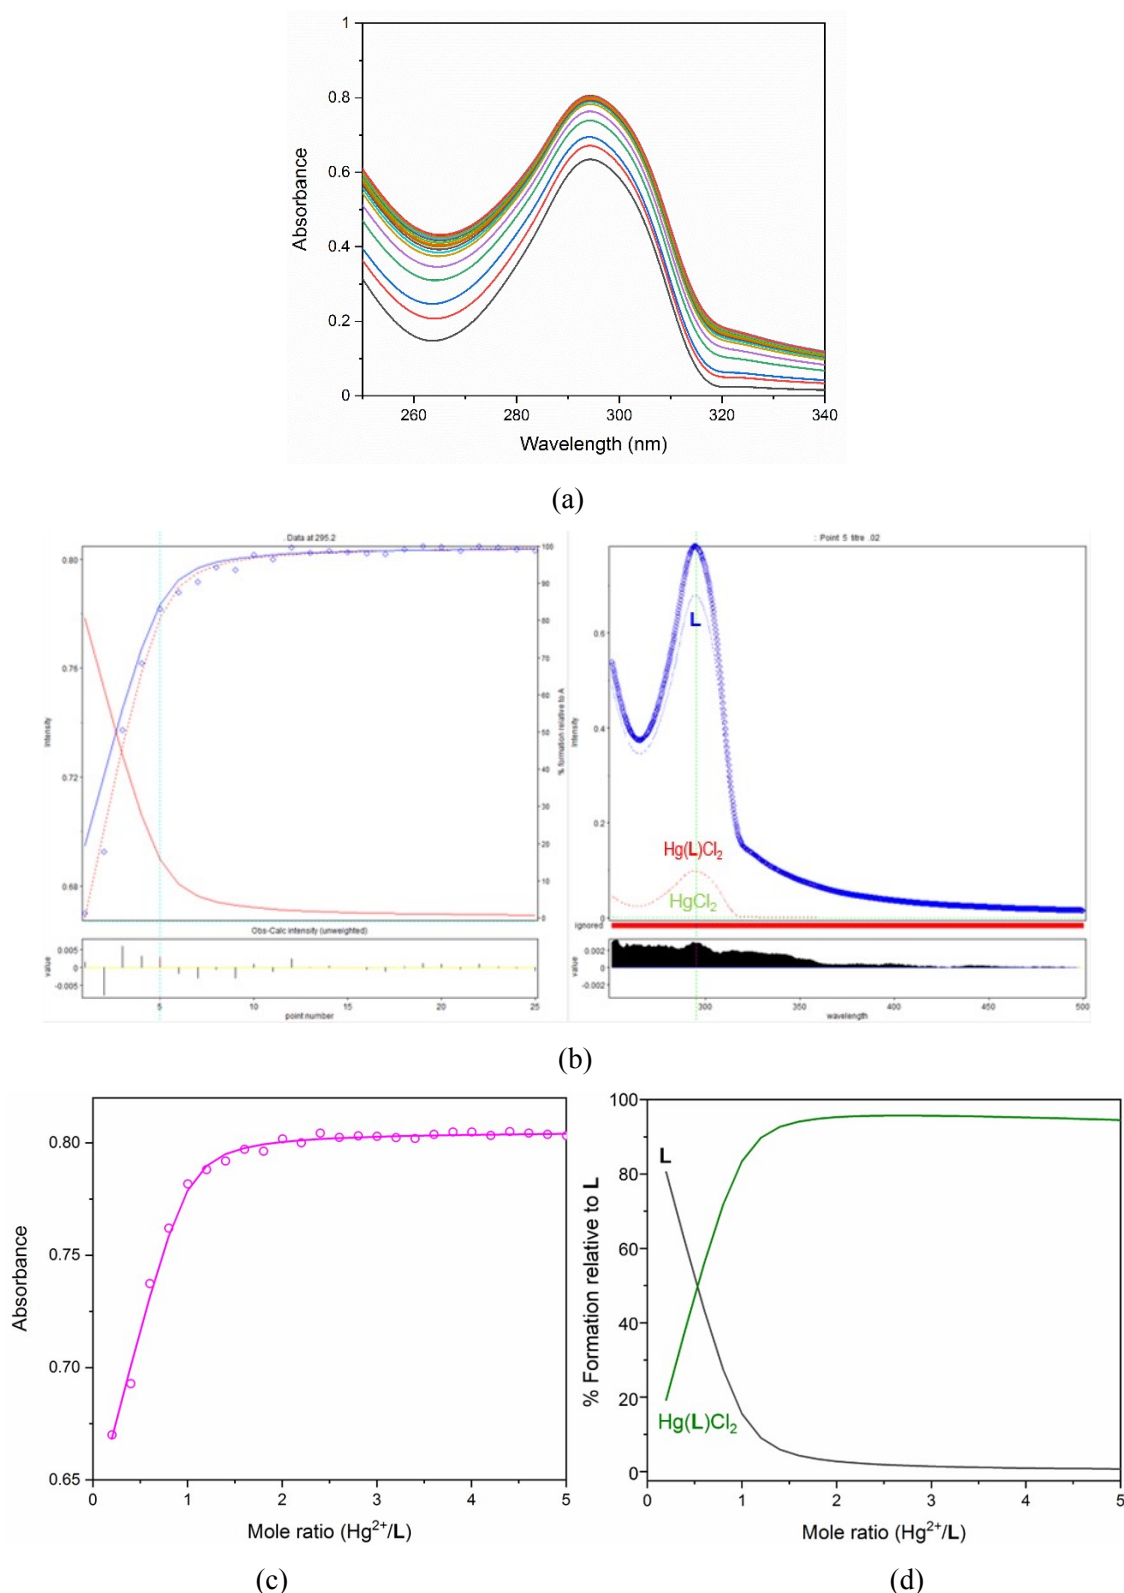

**Fig. S8** (a) UV-vis titration of **L** (0.04 mM) with  $\text{HgCl}_2$  (0-5.0 equiv.) in  $\text{CHCl}_3/\text{CH}_3\text{OH}$  (1:2.5 v/v), (b) HypSpec<sup>SS</sup> output for the fitting of UV-vis titration data (input data: 250-500 nm) to determine the formation constant by employing the 1:1 (M-to-L) binding model [variables: 1.0 equiv. (left), 295.2 nm (right)], (c) modified plot (mole ratio vs Abs. at 295.2 nm) for the fitting data (circle: experimental points, solid line: theoretical fit) and (d) modified plot (mole ratio vs fraction%) for the species distribution showing free **L** (black), 1:1 complex ( $\text{Hg(L)Cl}_2$ , green).

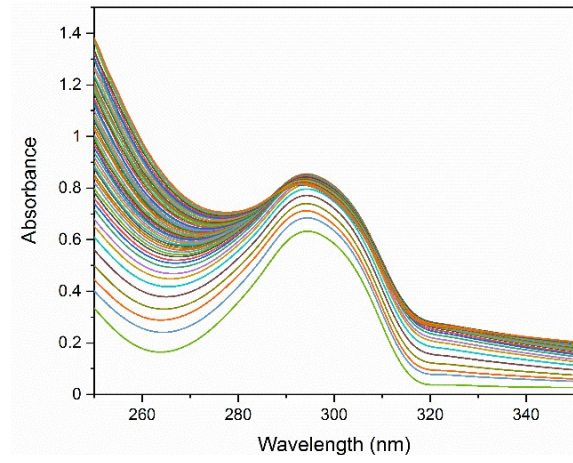

(a)

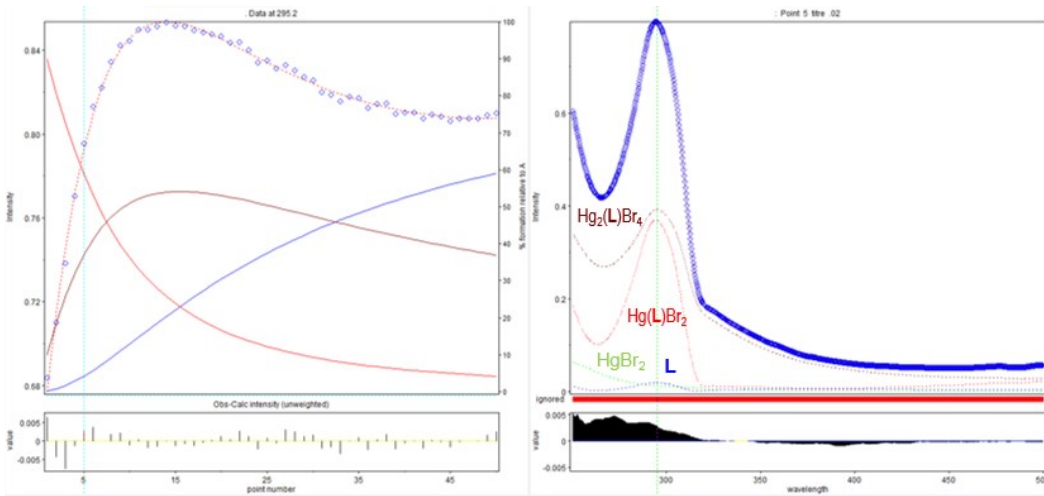

(b)

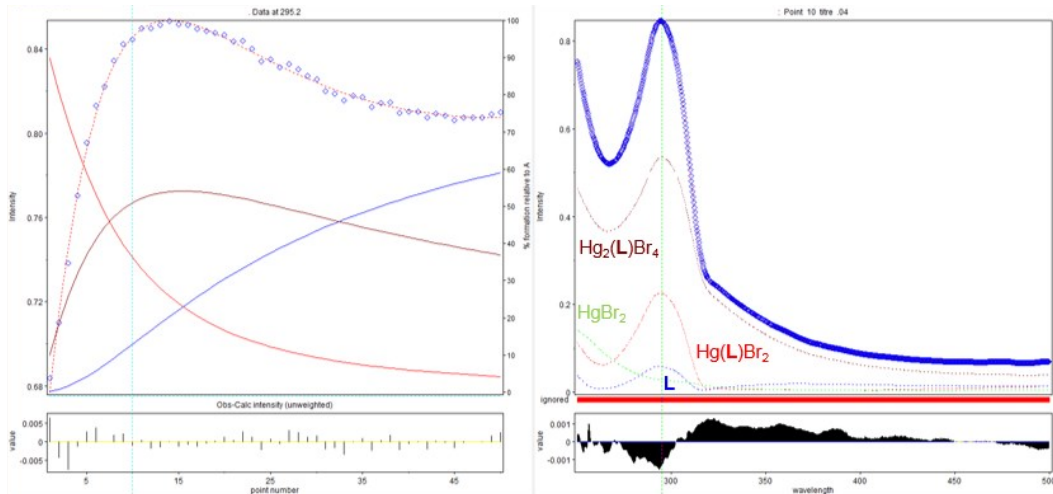

(c)

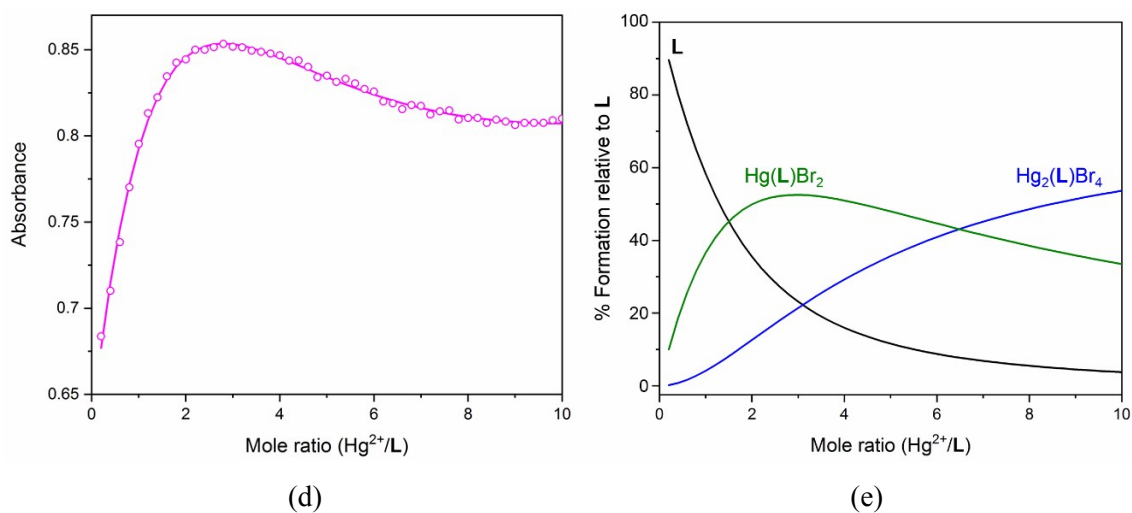

**Fig. S9** (a) UV-vis titration of **L** (0.04 mM) with  $\text{HgBr}_2$  (0-10.0 equiv.) in  $\text{CHCl}_3/\text{CH}_3\text{OH}$  (1:2.5 v/v), (b) HypSpec<sup>SS</sup> output for the fitting of UV-vis titration data (input data: 250-500 nm) to determine the formation constants by employing the 1:1 and 2:1 (M-to-L) binding models [variables: 1.0 equiv. (left), 295.2 nm (right)], (c) [variables: 2.0 equiv. (left), 295.2 nm (right)], (d) modified plot (mole ratio vs Abs. at 295.2 nm) for the fitting data (circle: experimental points, solid line: theoretical fit) and (e) modified plot (mole ratio vs fraction%) for the species distribution showing free **L** (black), 1:1 complex ( $\text{Hg}(\text{L})\text{Br}_2$ , green), and 2:1 complex ( $\text{Hg}_2(\text{L})\text{Br}_4$ , blue).

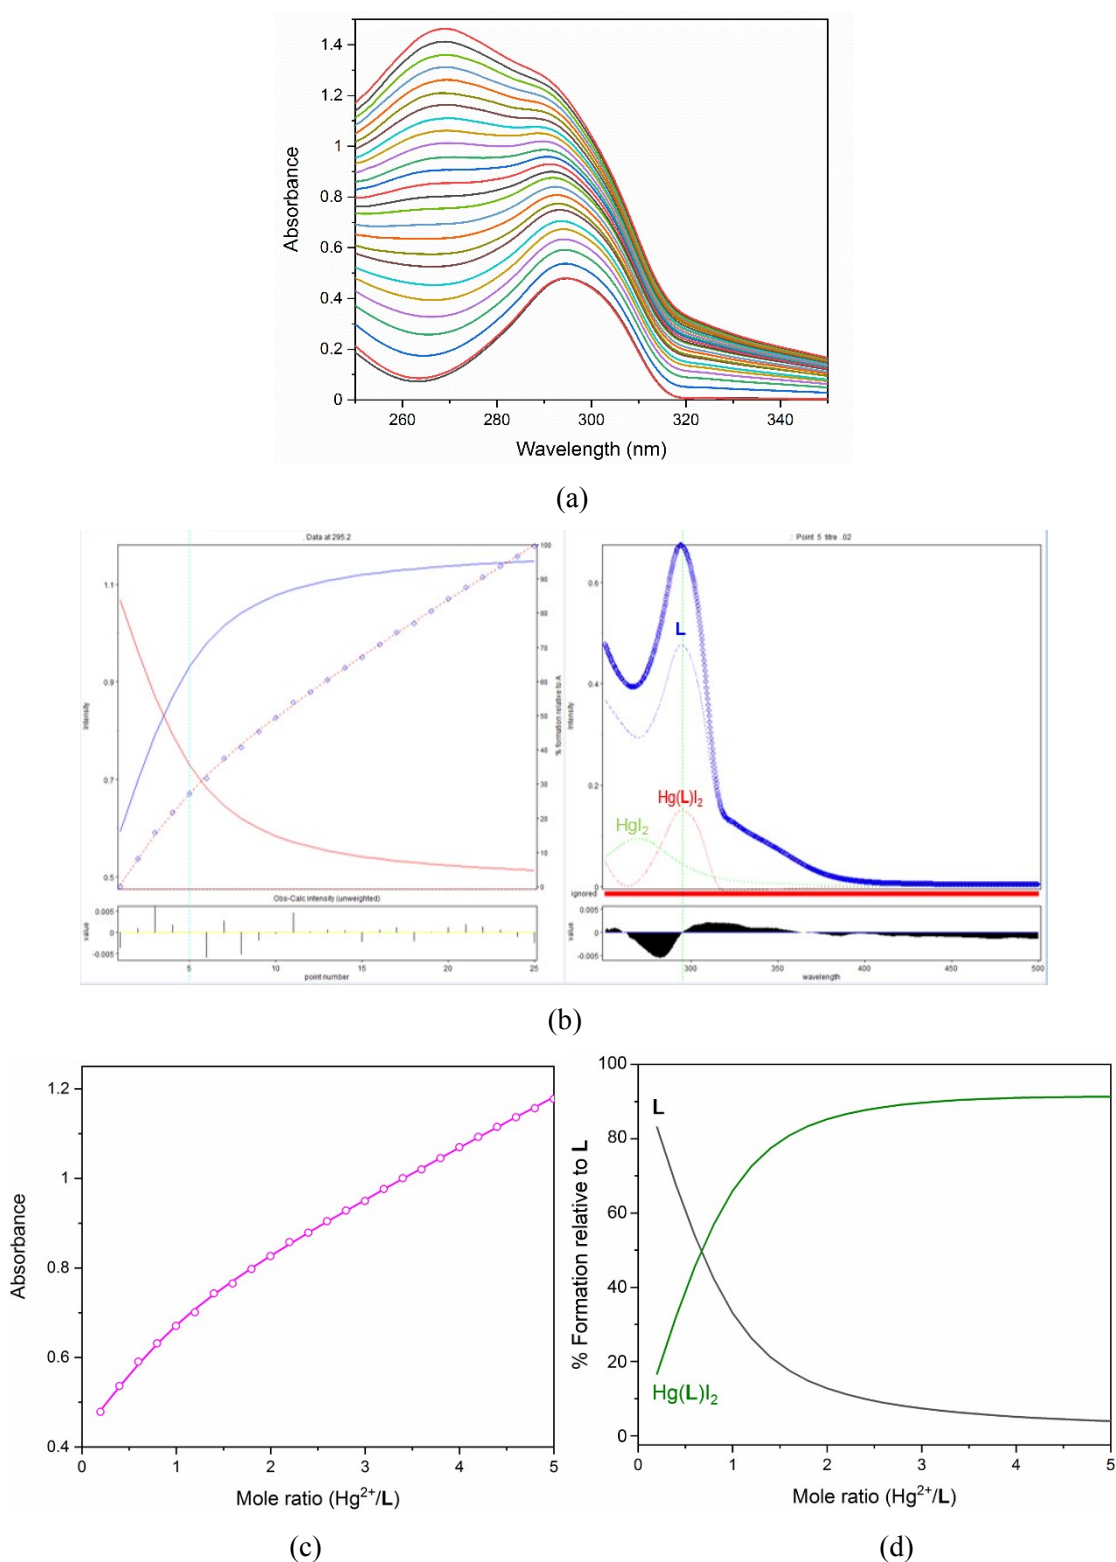

**Fig. S10** (a) UV-vis titration of **L** (0.04 mM) with  $\text{HgI}_2$  (0-5.0 equiv.) in  $\text{CHCl}_3/\text{CH}_3\text{OH}$  (1:2.5  $v/v$ ), (b) HypSpec<sup>SS</sup> output for the fitting of UV-vis titration data (input data: 250-500 nm) to determine the formation constants by employing the 1:1 (M-to-L) binding model [variables: 1.0 equiv. (left), 295.2 nm (right)], (c) modified plot (mole ratio vs Abs. at 295.2 nm) for the fitting data (circle: experimental points, solid line: theoretical fit) and (d) modified plot (mole ratio vs fraction%) for the species distribution showing free **L** (black), 1:1 complex ( $\text{Hg(L)I}_2$ ), green).

## References

- [S1] Bruker, *APEX2 Version 2009.1-0 Data collection and Processing Software*, Bruker AXS Inc., Madison, Wisconsin, U.S.A., 2008.
- [S2] Bruker, *SHELXTL-PC Version 6.22 Program for Solution and Refinement of Crystal Structures*, Bruker AXS Inc., Madison, Wisconsin, U.S.A., 2008.
- [S3] E. Lee, H. Ryu, H. Ju, S. Kim, J.-E. Lee, J. H. Jung, S. Kuwahara, M. Ikeda, Y. Habata and S. S Lee, *Chem. Eur. J.*, 2019, **25**, 949-953.
- [S4] A. L. Spek, PLATON SQUEEZE: a tool for the calculation of the disordered solvent contribution to the calculated structure factors. *Acta Cryst.* 2015, **C71**, 9-18.
- [S5] (a) Online at <http://www.hyperquad.co.uk/HypSpec2014.htm>. (b) P. Gans, A. Sabatini, A. Vacca, *Talanta* 1996, **43**, 1739-1753.
